# Supplementary material for: In situ formed nickel phosphide/iron oxide heterojunction for accelerating hydrogen generation
Source: Royal Society of Chemistry journal article supplement (doi:10.1039/d4gc00393d), 2024-01-01
Supplement: d4gc00393d1.pdf [file d4gc00393d1.pdf]

## Supporting Information for:

### In Situ Formed Nickel Phosphide/Iron Oxide Heterojunction for Accelerating Hydrogen Generation

Wenjing Xu,<sup>\*a</sup> Wei Li,<sup>a</sup> Wei Chen,<sup>b</sup> Mei Liu,<sup>a</sup> Xianji Guo<sup>c</sup> and Baojun Li<sup>\*c</sup>

<sup>a</sup> School of Science, Jiaozuo Normal College, Jiaozuo, Henan 454000, PR China

<sup>b</sup> Jiaozuo Houji Chemical Co., LTD, Jiaozuo, Henan 454500, PR China

<sup>c</sup> College of Chemistry, Zhengzhou University, Zhengzhou 450001, PR China

\* Corresponding Author. xwj900128@jzsz.edu.cn (W J Xu), lbjfc1@zzu.edu.cn (B J Li).

**Total number of pages: 26**

**Total number of Figures: 22**

**Total number of Tables: 5**

## Experimental Section

*Chemicals.* Ferric nitrate nonahydrate ( $\text{Fe}(\text{NO}_3)_3 \cdot 9\text{H}_2\text{O}$ ), nickel nitrate hexahydrate ( $\text{Ni}(\text{NO}_3)_2 \cdot 6\text{H}_2\text{O}$ ), glycerol, isopropanol and sodium hypophosphite ( $\text{NaH}_2\text{PO}_2$ ) were purchased from Sinopharm Chemical Reagent Co., Ltd. (Shanghai, China). Ammonia borane ( $\text{NH}_3\text{BH}_3$ ), sodium hydroxide ( $\text{NaOH}$ ), and ethanol were supplied by Maclin Biochemical Technology Co., Ltd (Shanghai, China). All reagents used in this study are analytical grade.

*Characterization.* The micro morphologies of the samples were characterized using JSM-6700F scanning electron microscopy (SEM, JEOL Ltd., Japan). The specific surface areas of the samples were measured with nitrogen adsorption isotherms on a specific surface analyzer (ASAP 2420, Micrometrics, USA). The Brunauer-Emmett-Teller (BET) and nonlocalization density functional theory (NLDFT) techniques were employed for surface area and pore diameter calculation. The thermogravimetric analysis (TGA) experiments were carried out on a STA 449F3 thermal analyzer (Netzsch, Germany) in argon flow under temperature range from 30 °C to 800 °C at 10 °C  $\text{min}^{-1}$ .

*Catalytic hydrolysis of  $\text{NH}_3\text{BH}_3$ .* Catalytic performance of as-prepared catalysts was evaluated through a water-displacement method to collect the generated hydrogen during the  $\text{NH}_3\text{BH}_3$  hydrolysis. The catalyst (15 mg) was put into a round bottom flask (50 mL) fixed on an electric heated thermostatic magnetic stirring water bath. Then, a  $\text{NH}_3\text{BH}_3$  aqueous solution (5 mL, 0.246 mol  $\text{L}^{-1}$ ) containing  $\text{NaOH}$  (200 mg, 1.0 mol  $\text{L}^{-1}$ ) was injected through a syringe. The reaction was carried out under magnetic stirring at 500 rpm, 25 °C. The produced hydrogen flowed into a gas burette (100 mL) filled with water, and the volume of water was equal to the volume of hydrogen produced. The specific rates ( $r_B$ ) of hydrogen generation were calculated as follows (eq. 1):

$$r_B = \frac{40(\text{mL})}{[t_{60} - t_{20}] \cdot w_c (\text{g})} \quad (\text{eq. 1})$$

Where  $t_{60}$  and  $t_{20}$  represent the time for 60 and 20 mL of hydrogen generation, respectively, and  $w_c$  is the weight of Ni in the catalyst.

The value of turnover frequency (TOF,  $\text{min}^{-1}$ ), which is used to evaluate the catalytic activity of catalyst in  $\text{NH}_3\text{BH}_3$  hydrolysis, was calculated by the following equation:

$$\text{TOF} = \frac{n_{H_2}}{n_{Ni}t} \quad (\text{eq. 2})$$

Where  $n_{H_2}$  is the moles of  $H_2$  generated and  $t$  is the reaction time during the 20-60 mL.  $n_{Ni}$  is the total moles of Ni in the catalysts. Due to the monometallic catalyst of  $Ni_2P@C$  displays much higher activity than  $P-Fe_3O_4@C$  and the catalytic activity of  $P-Fe_3O_4@C$  is extremely low,  $r_B$  and TOF values are calculated according to the nickel content.

### Computational Method

We employed the first-principles [1,2] to perform all density functional theory (DFT) calculations within the generalized gradient approximation (GGA) using the Perdew-Burke-Ernzerhof (PBE) [3] formulation. We chose the projected augmented wave (PAW) potentials [4,5] to describe the ionic cores and take valence electrons into account using a plane wave basis set with a kinetic energy cutoff of 520 eV. Partial occupancies of the Kohn-Sham orbitals were allowed using the Gaussian smearing method and a width of 0.05 eV. The electronic energy was considered self-consistent when the energy change was smaller than  $10^{-6}$  eV. A geometry optimization was considered convergent when the energy change was smaller than 0.05 eV  $\text{\AA}^{-1}$ . The vacuum spacing in a direction perpendicular to the plane of the structure was 20  $\text{\AA}$  for the surfaces. The Brillouin zone integration was performed using  $2 \times 2 \times 1$  Monkhorst-Pack k-point sampling for a structure. Finally, the adsorption energies ( $E_{ads}$ ) were calculated as  $E_{ads} = E_{ad/sub} - E_{ad} - E_{sub}$ , where  $E_{ad/sub}$ ,  $E_{ad}$ , and  $E_{sub}$  are the total energies of the optimized adsorbate/substrate system, the adsorbate in the structure, and the clean substrate, respectively. The free energy was calculated using the equation:

$$G = E_{ads} + E_{ZPE} - TS$$

where  $G$ ,  $E_{ads}$ ,  $E_{ZPE}$  and  $TS$  are the free energy, total energy from DFT calculations, zero point energy and entropic contributions, respectively.

**Table S1.** Pyrolysis conditions and the contents of Fe and Ni determined by ICP-MS.

| Sample                                                  | Precursor | Pyrolysis conditions                                            | Fe <sup>a</sup><br>(wt%) | Ni <sup>a</sup><br>(wt%) | $n_{\text{Fe}}/n_{\text{Ni}}$ | TOF<br>(min <sup>-1</sup> ) |
|---------------------------------------------------------|-----------|-----------------------------------------------------------------|--------------------------|--------------------------|-------------------------------|-----------------------------|
| Fe <sub>3</sub> O <sub>4</sub> -Ni <sub>2</sub> P@C     | FeNi-Gly  | NaH <sub>2</sub> PO <sub>2</sub> , N <sub>2</sub> , 300 °C, 4 h | 6.35                     | 14.21                    | 1/2.13                        | 92.8                        |
| P-FeNiO <sub>x</sub> @C-250                             | FeNi-Gly  | NaH <sub>2</sub> PO <sub>2</sub> , N <sub>2</sub> , 250 °C, 4 h | 6.75                     | 15.25                    | 1/2.13                        | 50.3                        |
| Fe <sub>3</sub> O <sub>4</sub> -Ni <sub>2</sub> P@C-400 | FeNi-Gly  | NaH <sub>2</sub> PO <sub>2</sub> , N <sub>2</sub> , 400 °C, 4 h | 6.41                     | 14.44                    | 1/2.13                        | 32.3                        |
| Fe <sub>3</sub> O <sub>4</sub> -Ni <sub>2</sub> P@C-600 | FeNi-Gly  | NaH <sub>2</sub> PO <sub>2</sub> , N <sub>2</sub> , 600 °C, 4 h | 6.84                     | 15.32                    | 1/2.13                        | 14.5                        |
| Ni <sub>2</sub> P@C                                     | Ni-Gly    | NaH <sub>2</sub> PO <sub>2</sub> , N <sub>2</sub> , 300 °C, 4 h | 0                        | 23.01                    | 0/1                           | 20.0                        |
| P-Fe <sub>3</sub> O <sub>4</sub> @C                     | Fe-Gly    | NaH <sub>2</sub> PO <sub>2</sub> , N <sub>2</sub> , 300 °C, 4 h | 22.12                    | 0                        | 1/0                           | \                           |
| Fe <sub>3</sub> O <sub>4</sub> -NiO@C                   | FeNi-Gly  | N <sub>2</sub> , 300 °C, 4 h                                    | 11.30                    | 25.31                    | 1/2.13                        | 7.3                         |

<sup>a</sup> Measured by inductively coupled plasma mass spectrometry (ICP-MS, PQ-MS, Germany).

**Table S2.** Element contents of samples from XPS.

| Samples                                                 | Atomic ratio (at.%) |       |       |       |       |
|---------------------------------------------------------|---------------------|-------|-------|-------|-------|
|                                                         | P 2p                | C 1s  | O 1s  | Fe 2p | Ni 2p |
| Fe <sub>3</sub> O <sub>4</sub> -Ni <sub>2</sub> P@C     | 18.20               | 15.63 | 58.55 | 3.86  | 3.76  |
| P-FeNiO <sub>x</sub> @C-250                             | 12.24               | 18.46 | 57.70 | 3.96  | 7.64  |
| Fe <sub>3</sub> O <sub>4</sub> -Ni <sub>2</sub> P@C-400 | 18.45               | 17.93 | 54.69 | 3.54  | 5.39  |
| Fe <sub>3</sub> O <sub>4</sub> -Ni <sub>2</sub> P@C-600 | 15.90               | 26.29 | 48.95 | 4.88  | 3.98  |
| Ni <sub>2</sub> P@C                                     | 16.36               | 17.74 | 56.49 | 0     | 9.41  |
| P-Fe <sub>3</sub> O <sub>4</sub> @C                     | 15.01               | 16.75 | 54.69 | 13.55 | 0     |
| Fe <sub>3</sub> O <sub>4</sub> -NiO@C                   | 0                   | 30.09 | 50.34 | 6.09  | 13.48 |

**Table S3.** Textural properties obtained from N<sub>2</sub>-adsorption isotherms analysis.

| Sample                                              | BET surface area<br>(m <sup>2</sup> g <sup>-1</sup> ) | Total pore volume (cm <sup>3</sup><br>g <sup>-1</sup> ) | Average pore width<br>(nm) |
|-----------------------------------------------------|-------------------------------------------------------|---------------------------------------------------------|----------------------------|
| Fe <sub>3</sub> O <sub>4</sub> -Ni <sub>2</sub> P@C | 72.9                                                  | 0.25                                                    | 13.0                       |

**Table S4.** TOF values reported in the literatures.

| Catalysts                                           | TOF (H <sub>2</sub> ) (min <sup>-1</sup> ) | T (°C) | Ref.      |
|-----------------------------------------------------|--------------------------------------------|--------|-----------|
| Fe <sub>3</sub> O <sub>4</sub> -Ni <sub>2</sub> P@C | 92.8                                       | 25     | This work |
| Ni/ZIF-8                                            | 85.7                                       | 25     | 6         |
| Cu@Ni <sub>6</sub> -MOF                             | 69.1                                       | 25     | 7         |
| NiMn-decorated CNFs                                 | 58.2                                       | 30     | 8         |
| Cu <sub>0.5</sub> Ni <sub>0.5</sub> /CMK-1          | 54.8                                       | 25     | 9         |
| Ni NPs@3D-(N)GFs                                    | 41.7                                       | 25     | 10        |
| Ni <sub>2</sub> P                                   | 40.4                                       | 25     | 11        |
| Ni@MCS-30                                           | 30.7                                       | 25     | 12        |
| Ni/CNT                                              | 26.2                                       | 25     | 13        |
| Ni NPs/CNT                                          | 23.5                                       | 25     | 14        |
| Ni <sub>12</sub> P <sub>5</sub>                     | 23.0                                       | 25     | 15        |
| hcp-CuNi/C                                          | 22.64                                      | 25     | 16        |
| hcp-Ni/C                                            | 4.32                                       | 25     | 16        |
| fcc-Ni/C                                            | 2.10                                       | 25     | 16        |
| Ni@ZIF-8                                            | 14.2                                       | 25     | 17        |
| Cr <sub>2</sub> Ni <sub>3</sub> @carbon             | 5.78                                       | 25     | 18        |
| Ni/AC                                               | 4.8                                        | 25     | 19        |

**Table S5.** The free energy changes at different simulated catalysts by DFT calculations.

| Catalysts                                           | Physical adsorption             |                  | Transition state                |                  | Reaction barrier                |                  |
|-----------------------------------------------------|---------------------------------|------------------|---------------------------------|------------------|---------------------------------|------------------|
|                                                     | state energy (eV)               |                  | energy (eV)                     |                  | (eV)                            |                  |
|                                                     | NH <sub>3</sub> BH <sub>3</sub> | H <sub>2</sub> O | NH <sub>3</sub> BH <sub>3</sub> | H <sub>2</sub> O | NH <sub>3</sub> BH <sub>3</sub> | H <sub>2</sub> O |
| Fe <sub>3</sub> O <sub>4</sub> @C                   | -0.258                          | -0.105           | 1.972                           | 0.729            | 2.230                           | 0.834            |
| Ni <sub>2</sub> P@C                                 | -0.392                          | -0.203           | 1.592                           | 0.413            | 1.984                           | 0.616            |
| Fe <sub>3</sub> O <sub>4</sub> -Ni <sub>2</sub> P@C | -0.726                          | -0.317           | -0.279                          | 0.103            | 0.447                           | 0.420            |

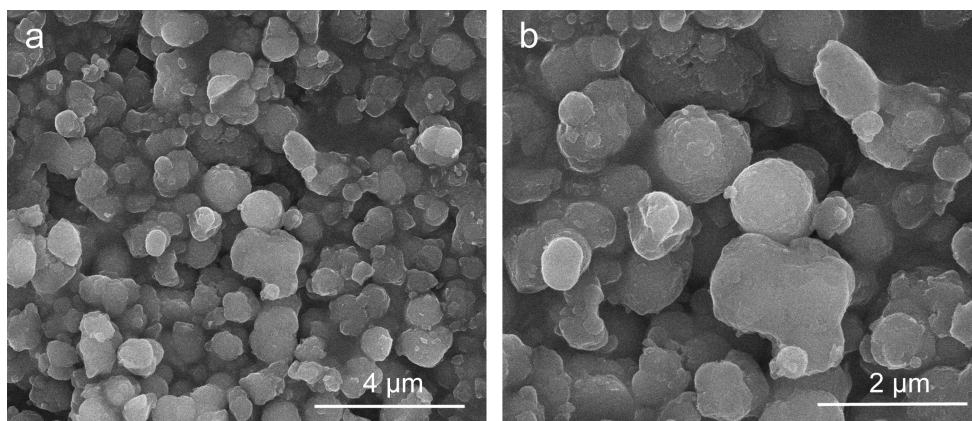

**Fig. S1.** (a, b) SEM images of FeNi-Gly.

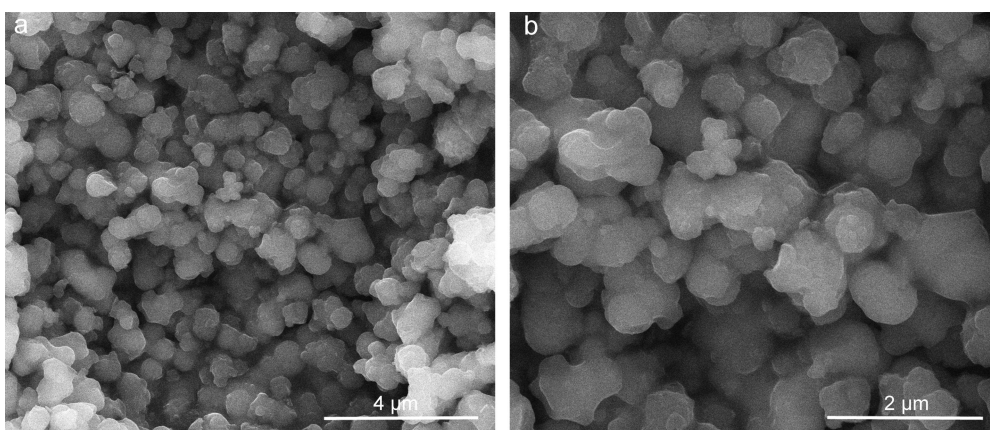

**Fig. S2.** (a, b) SEM images of Fe<sub>3</sub>O<sub>4</sub>-Ni<sub>2</sub>P@C.

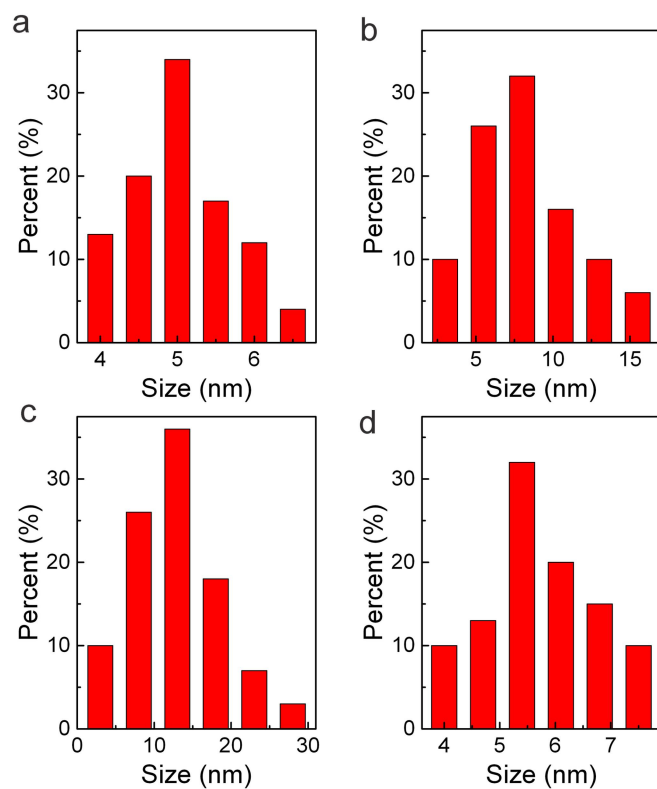

**Fig. S3.** Particle size distribution curves of (a) Fe<sub>3</sub>O<sub>4</sub>-Ni<sub>2</sub>P in the Fe<sub>3</sub>O<sub>4</sub>-Ni<sub>2</sub>P@C catalyst, (b) Fe<sub>3</sub>O<sub>4</sub>-Ni<sub>2</sub>P in the Fe<sub>3</sub>O<sub>4</sub>-Ni<sub>2</sub>P@C-600 catalyst, (c) Ni<sub>2</sub>P in the Ni<sub>2</sub>P@C catalyst, and (d) Fe<sub>3</sub>O<sub>4</sub>-NiO in the Fe<sub>3</sub>O<sub>4</sub>-NiO@C catalyst.



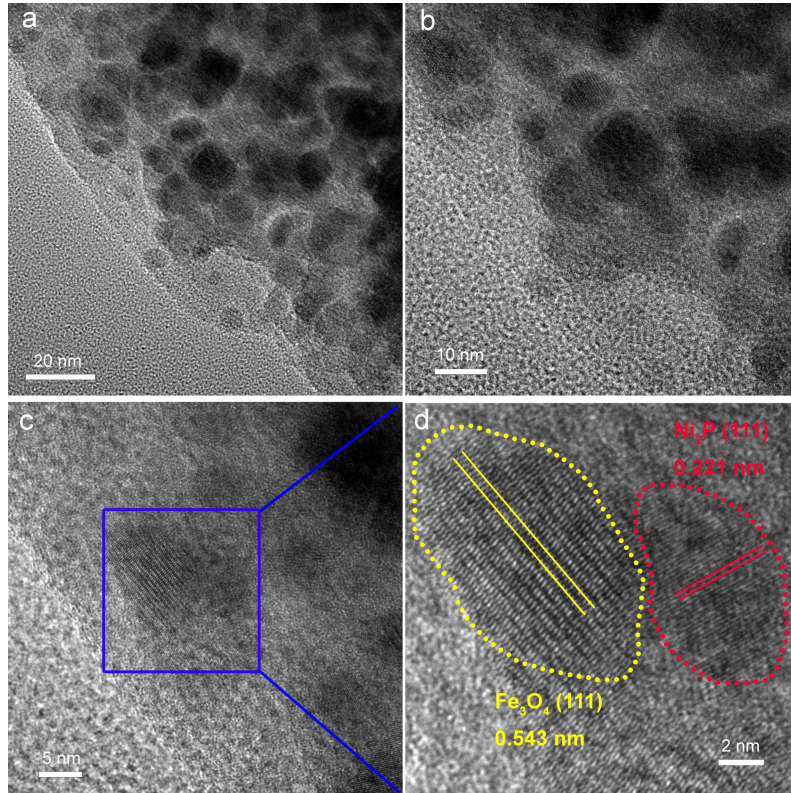

**Fig. S4.** TEM and HRTEM images of Fe<sub>3</sub>O<sub>4</sub>-Ni<sub>2</sub>P@C-600.

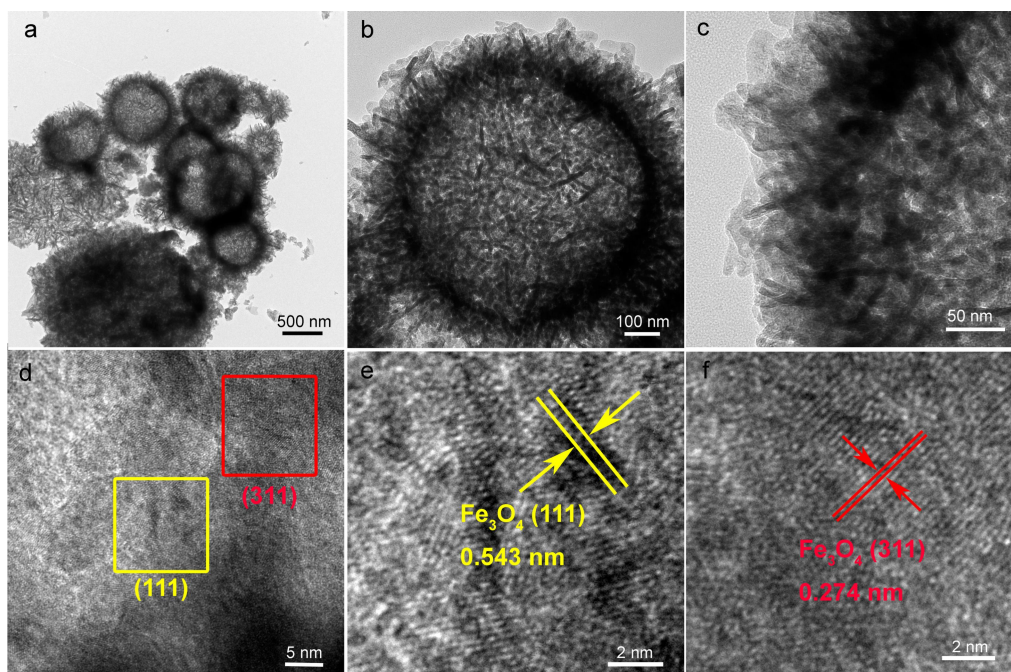

**Fig. S5.** TEM and HRTEM images of P-Fe<sub>3</sub>O<sub>4</sub>@C. TEM images of P-Fe<sub>3</sub>O<sub>4</sub>@C displays a hollow sphere morphology with diameters of about 500 nm, and the lattice spacing of about 0.543 and 0.274 nm, corresponding to (111) and (311) crystal planes of cubic Fe<sub>3</sub>O<sub>4</sub>, respectively, are observed in the HRTEM images.

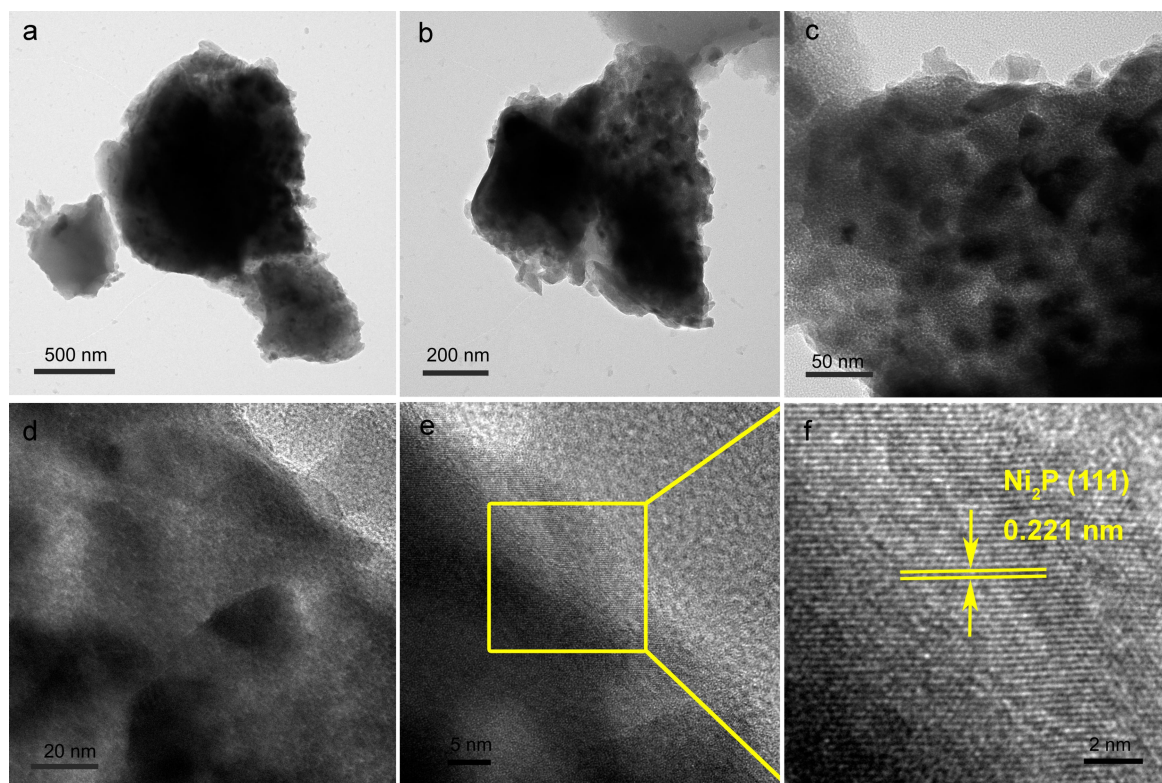

**Fig. S6.** TEM and HRTEM images of Ni<sub>2</sub>P@C. Large amounts of Ni<sub>2</sub>P nanocrystals distribute in the amorphous carbon support and the lattice plane of Ni<sub>2</sub>P (111) is found in the HRTEM image of Ni<sub>2</sub>P@C.

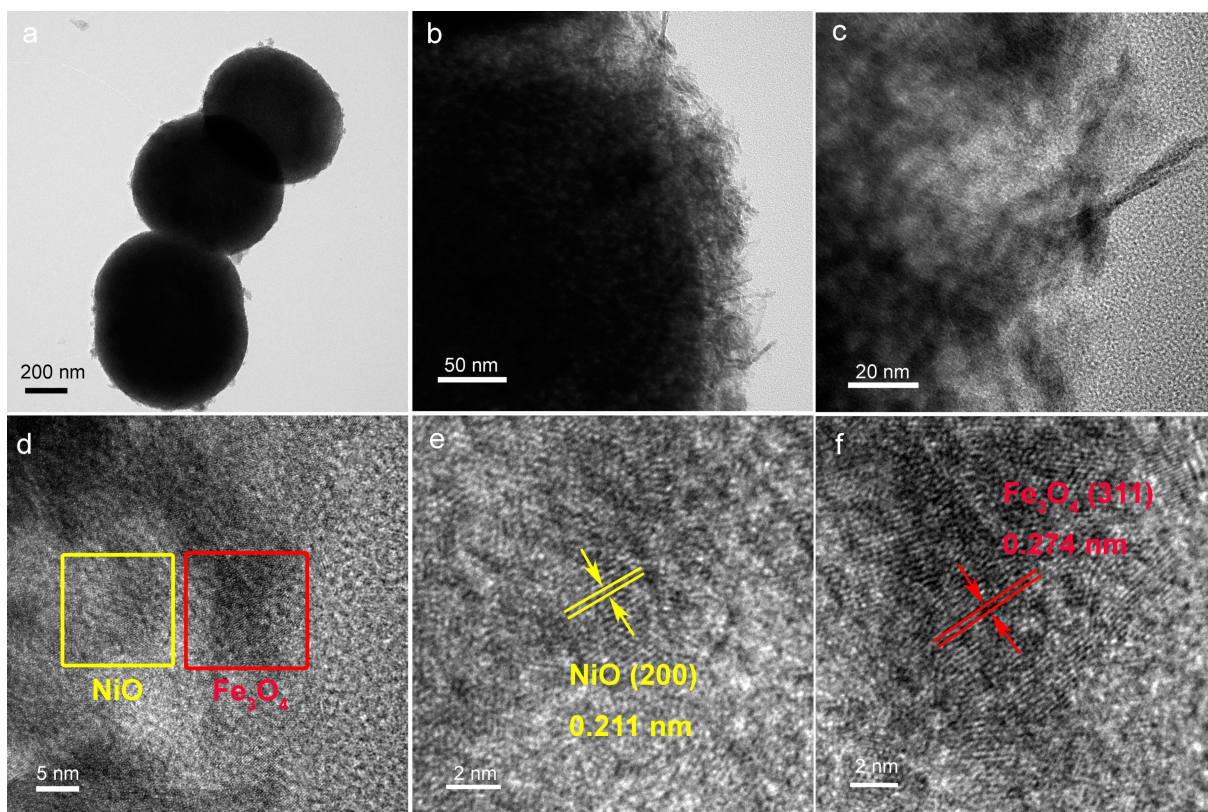

**Fig. S7.** TEM and HRTEM images of  $\text{Fe}_3\text{O}_4\text{-NiO@C}$ .  $\text{Fe}_3\text{O}_4\text{-NiO@C}$  sample was synthesized under the same conditions of  $\text{Fe}_3\text{O}_4\text{-Ni}_2\text{P@C}$  except for the absence of  $\text{NaH}_2\text{PO}_2$ . TEM images of  $\text{Fe}_3\text{O}_4\text{-NiO@C}$  exhibit a spherical morphology with diameters of about 600 nm. The lattice spacing of approximately 0.211 and 0.274 nm coincide well with the NiO (200) [20,21] and  $\text{Fe}_3\text{O}_4$  (311) planes, respectively.

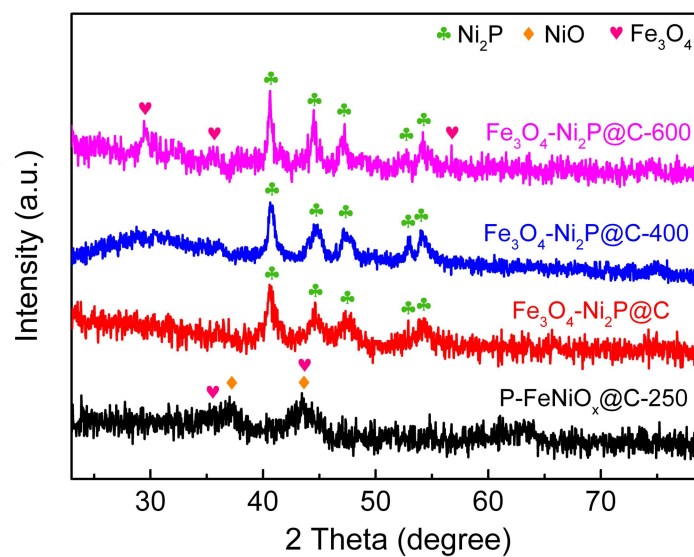

**Fig. S8.** PXRD patterns of the samples prepared at different phosphorization temperatures. Fe<sub>3</sub>O<sub>4</sub>-Ni<sub>2</sub>P@C-600 and Fe<sub>3</sub>O<sub>4</sub>-Ni<sub>2</sub>P@C-400 exhibit higher peak intensity than Fe<sub>3</sub>O<sub>4</sub>-Ni<sub>2</sub>P@C, and the characteristic peaks of Fe<sub>3</sub>O<sub>4</sub> are also observed in the Fe<sub>3</sub>O<sub>4</sub>-Ni<sub>2</sub>P@C-600, suggesting their larger crystal grains due to the higher pyrolysis temperature. P-FeNiO<sub>x</sub>@C-250 sample consists of NiO and Fe<sub>3</sub>O<sub>4</sub> crystals without Ni<sub>2</sub>P.

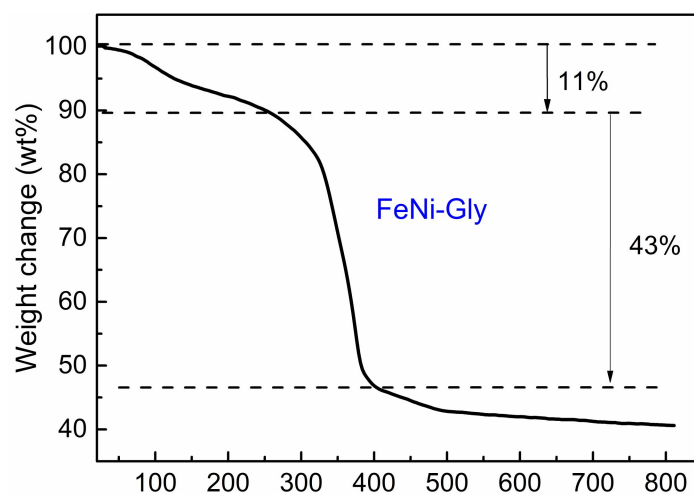

**Fig. S9.** The TGA curve of FeNi-Gly. The TGA result of FeNi-Gly in argon flow displays two mass losses. The first mass loss of 11.0 wt% occurred between 30 and 260 °C, due to the loss of adsorbed water molecules. The second mass loss of 43.0 wt% within 260-404 °C could be attributed to the decomposition of glycerol ligand in FeNi-Gly [22]. FeNi-Gly rarely decomposes in argon flow at 300 °C.

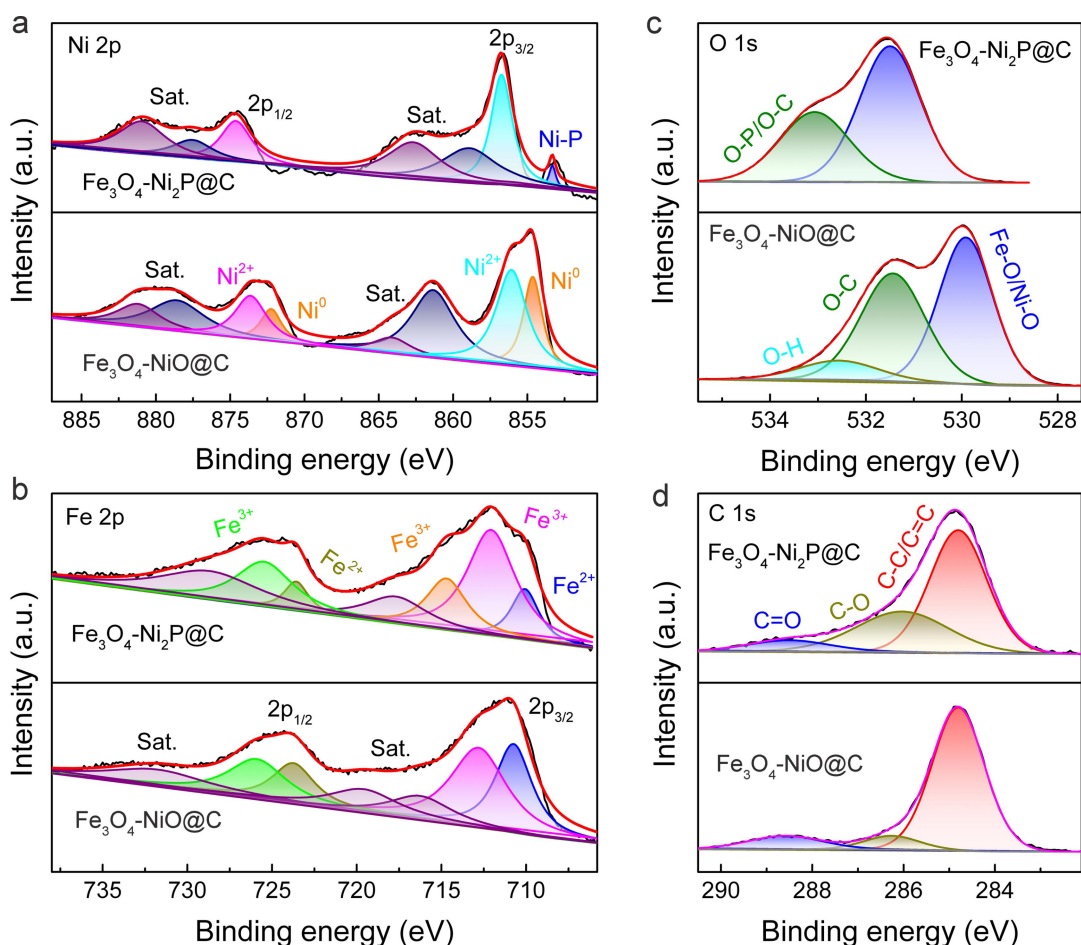

**Fig. S10.** (a-d) XPS spectra of Ni 2p, Fe 2p, O 1s and C 1s of the Fe<sub>3</sub>O<sub>4</sub>-Ni<sub>2</sub>P@C and Fe<sub>3</sub>O<sub>4</sub>-NiO@C catalysts. Fig. S10a suggests that nickel element is mainly present in Ni<sup>0</sup> (854.7 and 872.2 eV), and Ni<sup>2+</sup> oxidation state (856.1 and 873.7 eV) in the Fe<sub>3</sub>O<sub>4</sub>-NiO@C, while mainly in Ni<sup>2+</sup> (856.7 and 874.6 eV) in the Fe<sub>3</sub>O<sub>4</sub>-Ni<sub>2</sub>P@C. Fig. S10b shows iron element is in Fe<sup>2+</sup> (710.1-710.8 eV) and Fe<sup>3+</sup> (712.0-714.7 eV) in the two catalysts. The peak of Ni<sup>0</sup> 2p completely disappeared during surface-phosphorization process, suggesting that P species reacted with Ni<sup>0</sup> and was introduced into the material successfully. Compared to Fe<sub>3</sub>O<sub>4</sub>-NiO@C catalyst, the binding energies of Ni 2p, Fe 2p and O 1s shift after the formation of Fe<sub>3</sub>O<sub>4</sub>-Ni<sub>2</sub>P@C catalyst, indicating intrinsic charge redistribution among these elements during introducing P. This fact provides solid evidence of the role of phosphorization.

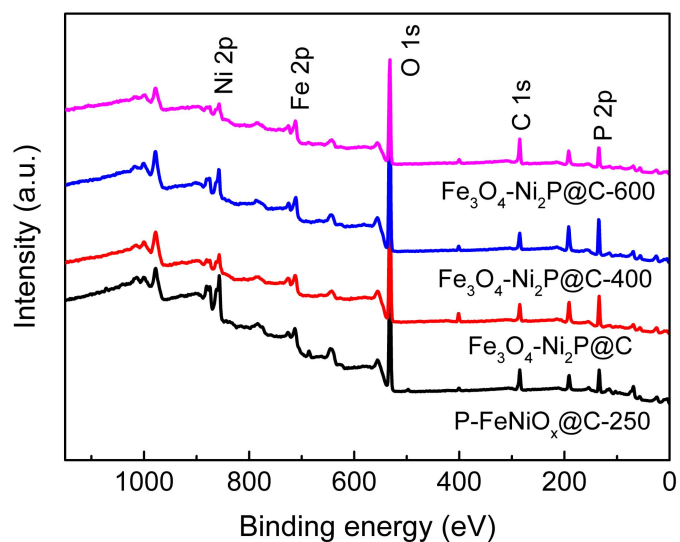

**Fig. S11.** The survey XPS spectra of samples prepared at different temperatures. The image clearly shows the presence of Fe, Ni, C, O, and P elements, indicating successful synthesis of samples at different temperatures.



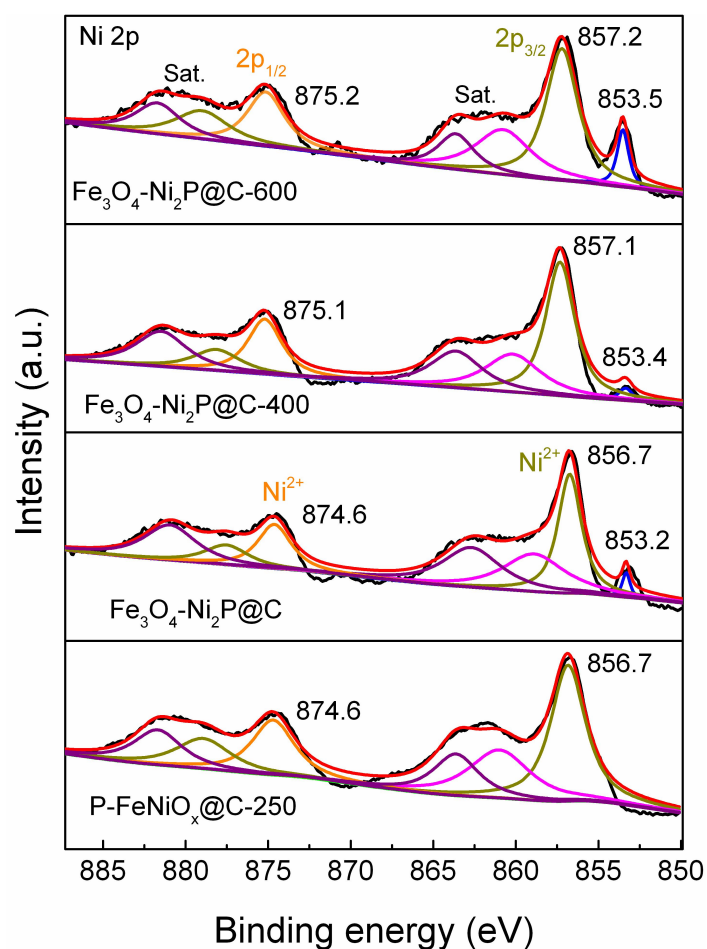

**Fig. S12.** High-resolution Ni 2p XPS spectra of samples prepared at different temperatures. In the Ni 2p spectra of samples prepared at different temperatures, the peaks at 856.7-857.2 and 874.6-875.2 eV could be ascribed to  $2p_{3/2}$  and  $2p_{1/2}$  orbitals of  $\text{Ni}^{2+}$  with the broad satellite peaks. Obviously, the peaks of Ni  $2p_{3/2}$  and Ni  $2p_{1/2}$  are shifted to higher binding energies with the increase in temperature. The peaks at 853.2-853.5 eV are linked to the formation of Ni-P. No Ni-P peak is observed in the  $\text{Fe}_3\text{O}_4\text{-Ni}_2\text{P@C-250}$  sample, further verifying that the  $\text{Ni}_2\text{P}$  was generated at the phosphorization temperature above 300 °C.

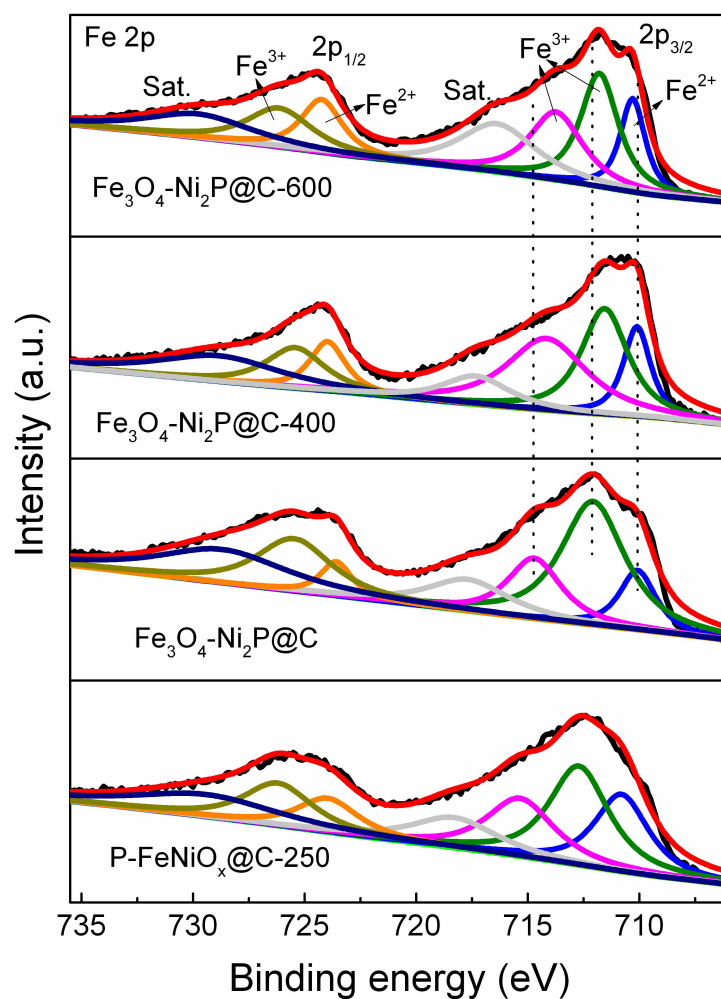

**Fig. S13.** High-resolution Fe 2p XPS spectra of samples prepared at different temperatures. In the Fe 2p spectra, the peaks at 710.1-710.6 and 711.5-715.2 eV could be assigned to Fe 2p<sub>3/2</sub> orbitals of Fe<sup>2+</sup> and Fe<sup>3+</sup> with the satellite peaks, respectively. With the increase in temperature, the peaks of Fe 2p<sub>3/2</sub> in Fe<sub>3</sub>O<sub>4</sub>-Ni<sub>2</sub>P@C-400 and Fe<sub>3</sub>O<sub>4</sub>-Ni<sub>2</sub>P@C-600 are shifted to lower binding energies. No Fe-P signal is observed even at high temperatures, indicating that no iron phosphide is generated in the bimetallic samples.

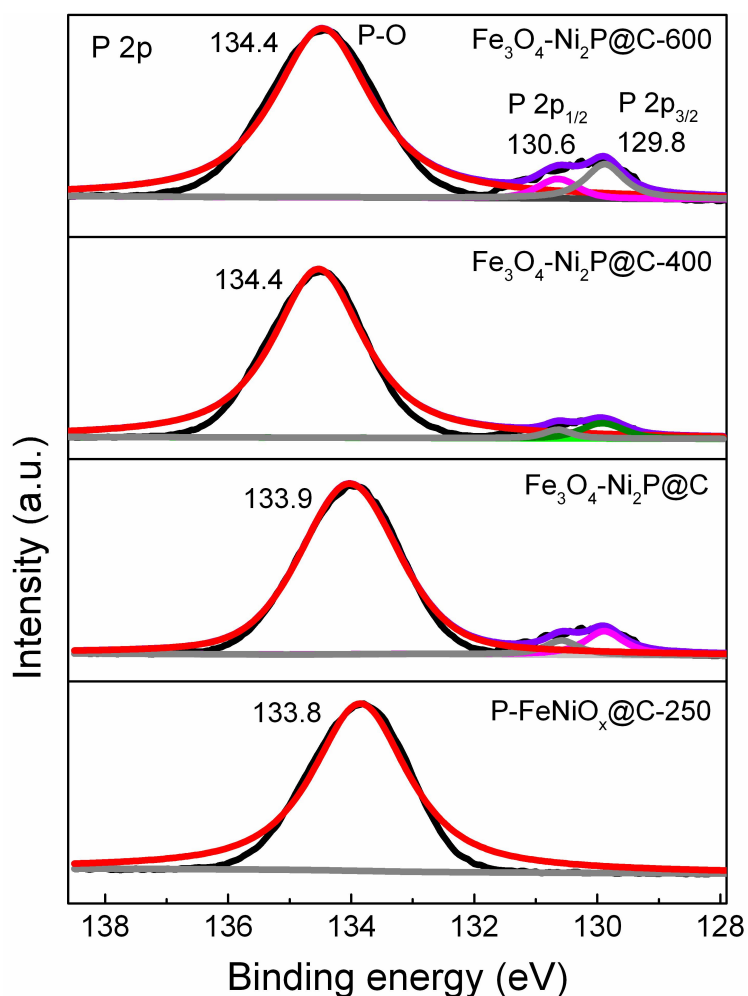

**Fig. S14.** High-resolution P 2p XPS spectra of samples prepared at different temperatures. The characteristic peaks at about 129.8 and 130.6 eV, corresponding to the P 2p<sub>3/2</sub> and 2p<sub>1/2</sub> states of metal phosphide, are also observed in the P 2p spectra of samples, except for the P-FeNiO<sub>x</sub>@C-250 sample. This is consistent with the Ni 2p spectra. The broad peaks at 133.8-134.4 eV are attributed to the P-O species, which are shifted to higher binding energies with the increase in temperature.

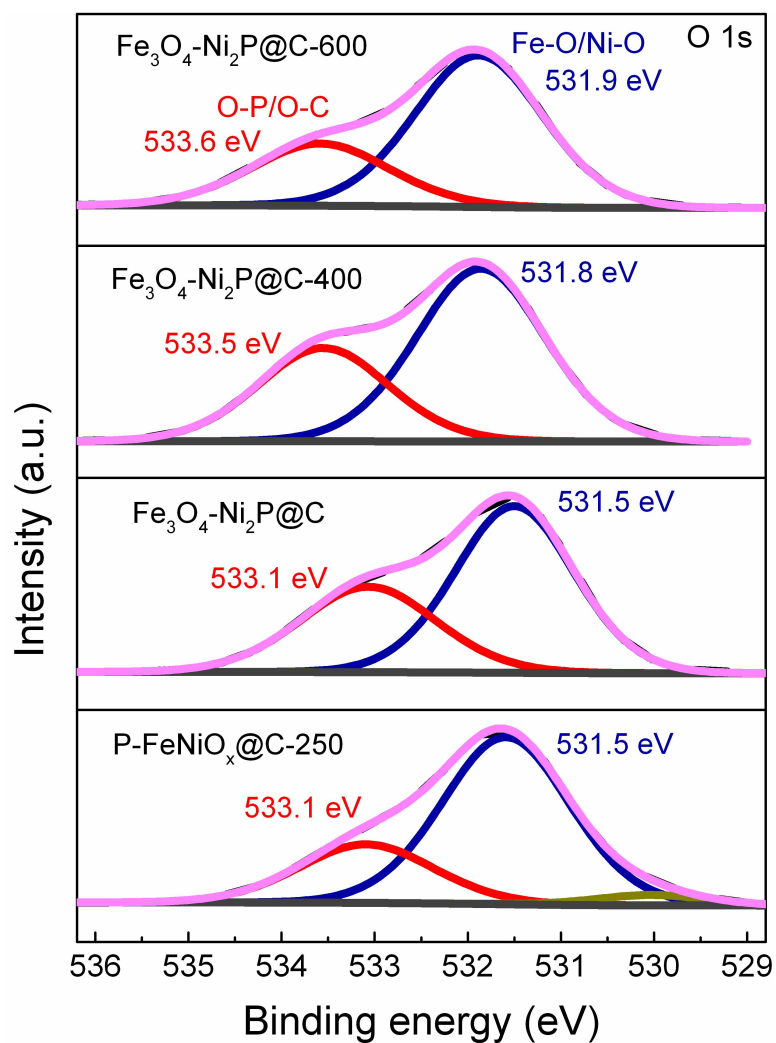

**Fig. S15.** High-resolution O 1s XPS spectra of samples prepared at different temperatures. The peaks at 531.5-531.9 and 533.1-533.6 eV are characteristic of Fe-O/Ni-O and O-P/O-C groups, and these two peaks in the Fe<sub>3</sub>O<sub>4</sub>-Ni<sub>2</sub>P@C-400 and Fe<sub>3</sub>O<sub>4</sub>-Ni<sub>2</sub>P@C-600 samples are shifted to higher binding energies with the increase in temperature.

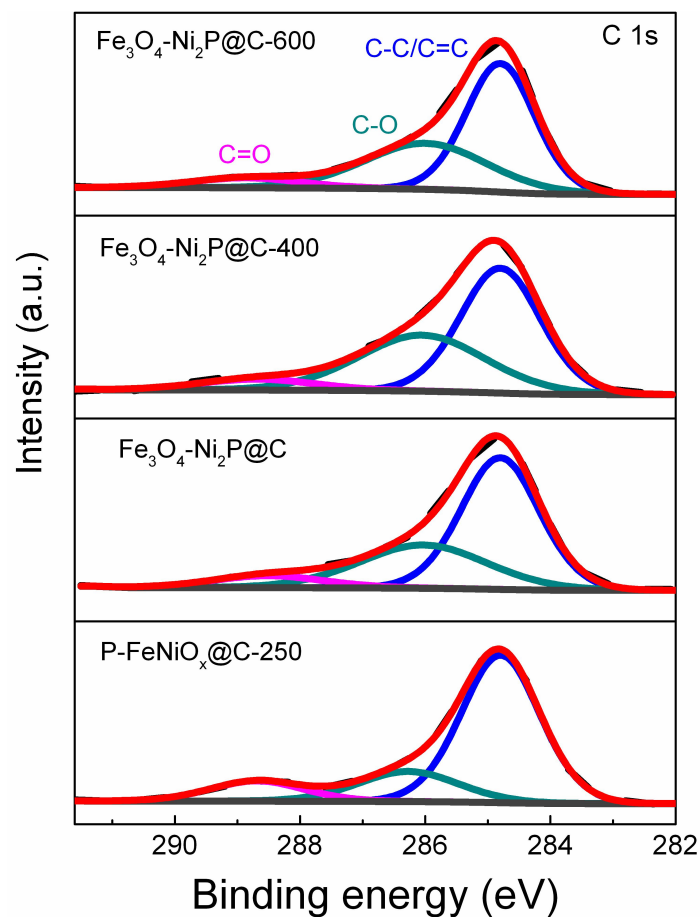

**Fig. S16.** High-resolution C 1s XPS spectra of samples prepared at different temperatures. The peaks at about 284.7, 286.1 and 288.7 eV are ascribed to C-C/C=C, C-O, and C=O groups, and no obvious shift is observed with the increase in temperature.

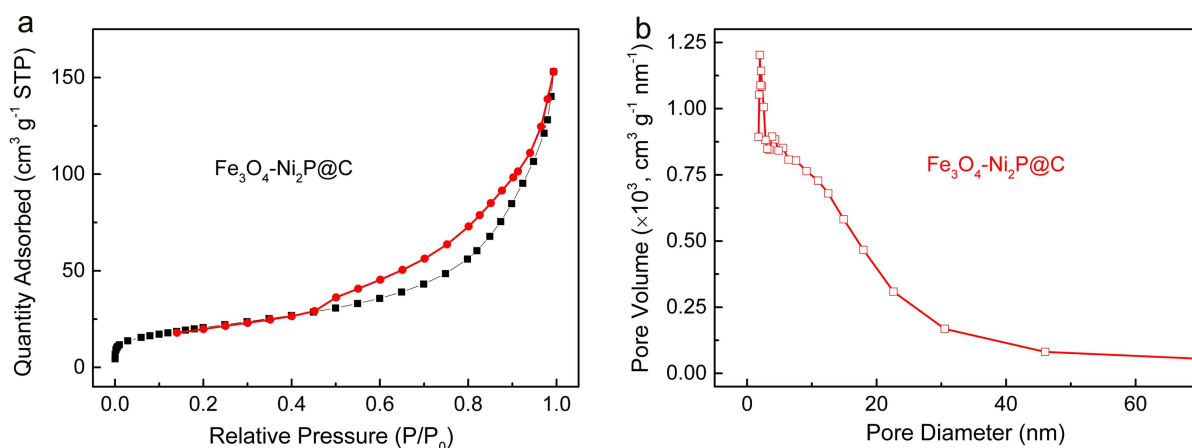

**Fig. S17.** (a) The N<sub>2</sub> adsorption-desorption isotherms and (b) pore-size distributions of Fe<sub>3</sub>O<sub>4</sub>-Ni<sub>2</sub>P@C.

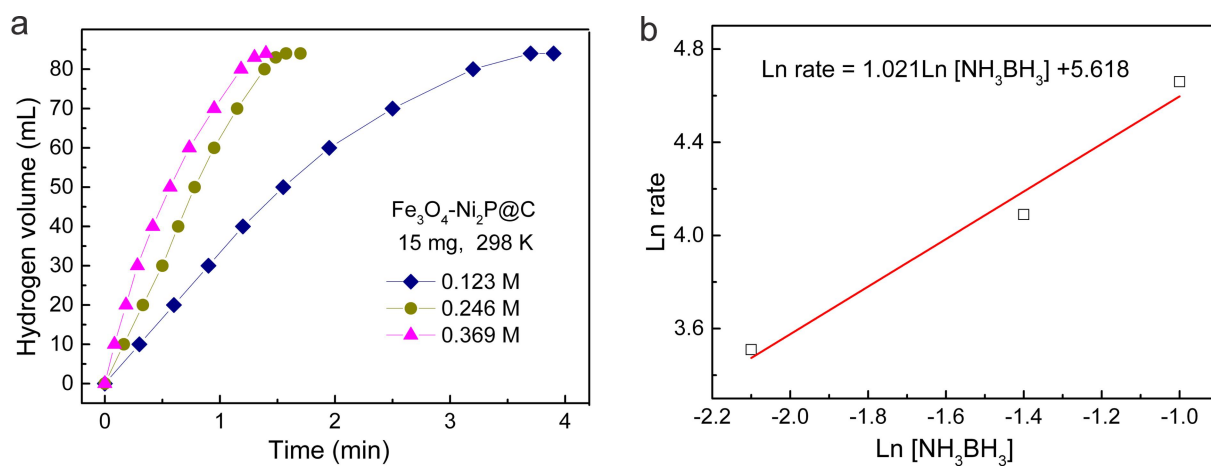

**Fig. S18.** (a) Hydrogen evolution for  $\text{NH}_3\text{BH}_3$  hydrolysis at various  $\text{NH}_3\text{BH}_3$  concentrations. (b) Logarithmic plots of rate versus concentration of  $[\text{NH}_3\text{BH}_3]$ .

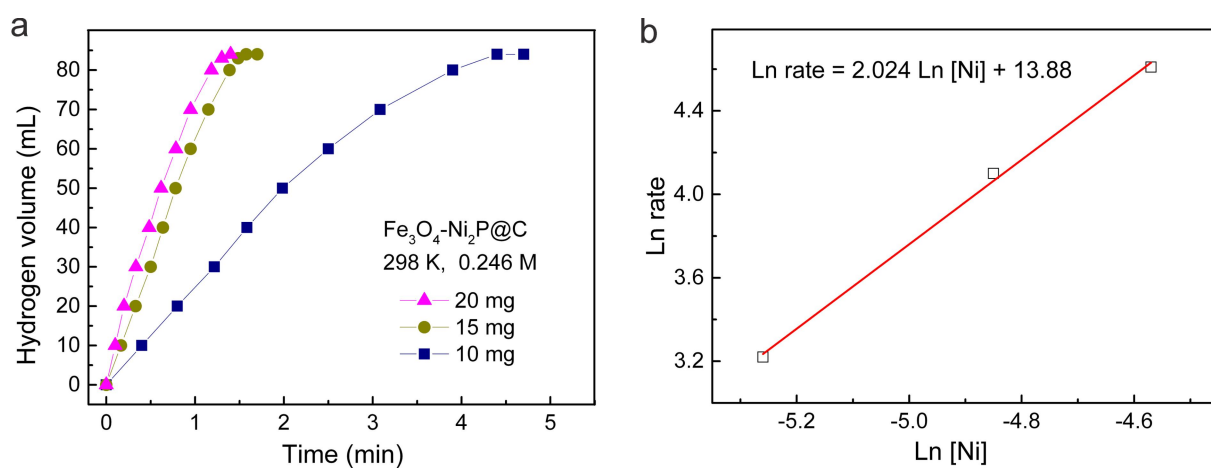

**Fig. S19.** (a) Hydrogen evolution for  $\text{NH}_3\text{BH}_3$  hydrolysis at various catalyst amounts. (b) Logarithmic plots of rate versus concentration of  $[\text{Ni}]$ .

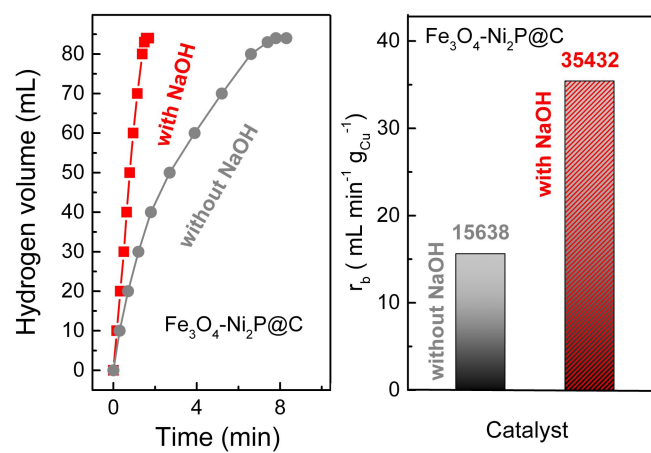

**Fig. S20.** Hydrogen generation for the  $\text{NH}_3\text{BH}_3$  hydrolysis with 1.0 M NaOH and without NaOH at 298 K and corresponding rates values.

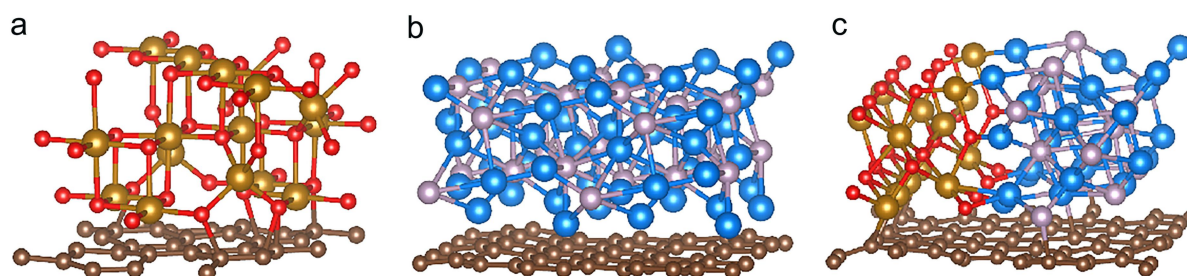

**Fig. S21.** The simulated structural models of (a)  $\text{Fe}_3\text{O}_4$ @C, (b)  $\text{Ni}_2\text{P}$ @C, and (c)  $\text{Fe}_3\text{O}_4$ - $\text{Ni}_2\text{P}$ @C catalysts.

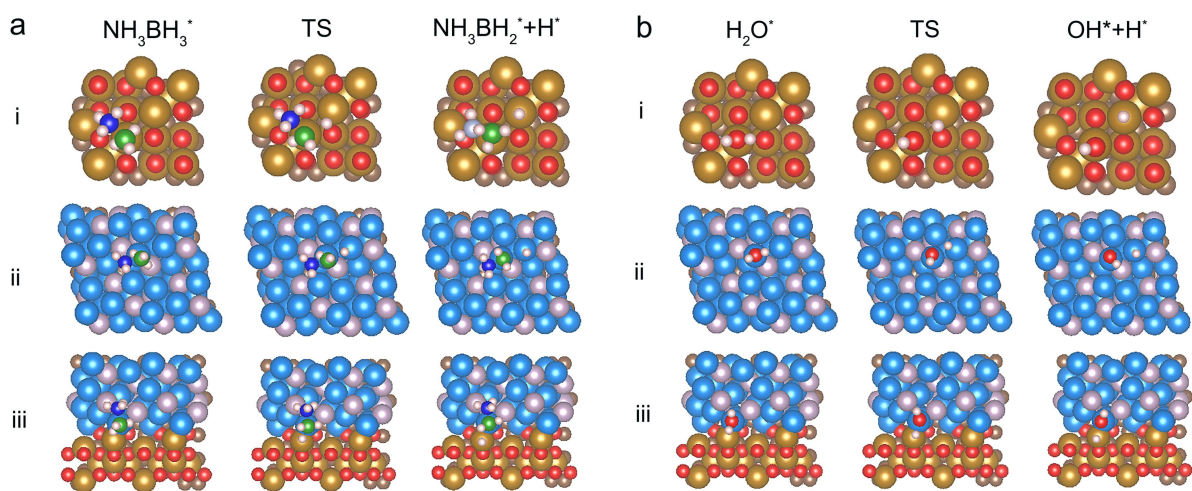

**Fig. S22.** i-iii are the optimized 3D structural models of (a)  $\text{NH}_3\text{BH}_3$  and (b)  $\text{H}_2\text{O}$  adsorption and dissociation at  $\text{Fe}_3\text{O}_4@\text{C}$ ,  $\text{Ni}_2\text{P}@\text{C}$  and  $\text{Fe}_3\text{O}_4\text{-Ni}_2\text{P}@\text{C}$  catalysts, respectively.



## References

- [1] G. Kresse, J. Furthmüller, *Comp. Mater. Sci.* 6 (1996) 15-50.
- [2] G. Kresse, J. Furthmüller, *Phys. Rev. B* 54 (1996) 11169-11186.
- [3] J.P. Perdew, K. Burke, M. Ernzerhof, *Phys. Rev. Lett.* 77 (1996) 3865-3868.
- [4] G. Kresse, D. Joubert, *Phys. Rev. B* 59 (1999) 1758-1775.
- [5] P.E. Blöchl, *Phys. Rev. B* 50 (1994) 17953-17979.
- [6] C. Wang, J. Tuninetti, Z. Wang, C. Zhang, R. Ciganda, L. Salmon, S. Moya, J. Ruiz, D. Astruc, *J. Am. Chem. Soc.* 139 (2017) 11610-11615.
- [7] W.J. Xu, M. Liu, S.F. Wang, Z.K. Peng, R.F. Shen, B.J. Li, *Int. J. Hydrogen Energy* 47 (2022) 23213-23220.
- [8] A. Abutaleb, N. Zouli, M.M. El-Halwany, M. Ubaidullah, A. Yousef, *Int. J. Hydrogen Energy* 46 (2021) 35248-35260.
- [9] H. Yen, Y. Seo, S. Kaliaguine, F. Kleitz, *ACS Catal.* 5 (2015) 5505-5511.
- [10] M. Mahyari, A. Shaabani, *J. Mater. Chem. A* 2 (2014) 16652-16659.
- [11] C.Y. Peng, L. Kang, S. Cao, Y. Chen, Z.S. Lin, W.F. Fu, *Angew. Chem. Int. Ed.* 54 (2015) 15725-15729.
- [12] P.Z. Li, A. Aijaz, Q. Xu, *Angew. Chem. Int. Ed.* 51 (2012) 6753.
- [13] J.K. Zhang, C.Q. Chen, W.J. Yan, F.F. Duan, B. Zhang, Z. Gao, Y. Qin, *Catal. Sci. Technol.* 6 (2016) 2112-2119.
- [14] G.Q. Zhao, J. Zhong, J. Wang, T.K. Sham, X.H. Sun, S.T. Lee, *Nanoscale* 7 (2015) 9715-9722.
- [15] S. Ghosh, S.R. Kadam, L. Houben, R. Bar-Ziv, M. Bar-Sadan, *Appl. Mater. Today* 20 (2020) 100693.
- [16] P. Li, R. Chen, Y. Huang, W. Li, S. Zhao, S. Tian, *Appl. Cataly. B: Environ.* 300 (2022) 120725.
- [17] P.Z. Li, K. Aranishiab, Q. Xu, *Chem. Commun.* 48 (2012) 3173.
- [18] R.M. Brooks, I.M. Maafa, A.M. Al-Enizi, M.M. El-Halwany, M. Ubaidullah, A. Yousef, *Nanomaterials*, 9 (2019) 1082.
- [19] S. Akbayrak, Z. Özçifçi, A. Tabak, *Biomass Bioenergy* 138 (2020) 105589.

- [20] H. Jiang, Y. Lin, B. Chen, Y. Zhang, H. Liu, X. Duan, D. Chen, L. Song, *Mater. Today* 21 (2018) 602-610.
- [21] H. Chen, S. He, M. Xu, M. Wei, D.G. Evans, X. Duan, *ACS Catal.* 7 (2017) 2735-2743.
- [22] Q. Hu, X.W. Huang, Z.Y. Wang, G.M. Li, Z. Han, H.P. Yang, X.Z. Ren, Q.L. Zhang, J.H. Liu, C.X. He, *J. Mater. Chem. A* 8 (2020) 2140-2146.
